# Supplementary material for: Phthalocyanine polymer grafted graphene oxide matrix as high-performance anode material for lithium-ion batteries
Source: Royal Society of Chemistry journal article supplement (doi:10.1039/d2se00853j), 2022-01-01
Supplement: d2se00853j1.pdf [file d2se00853j1.pdf]

## Supporting Information

### **Phthalocyanine polymer grafted graphene oxide matrix as high-performance anode material for lithium-ion batteries**

He Zhang<sup>[a]</sup>, Lucheng Li<sup>[a]</sup>, Jun Chen<sup>\*[a]</sup>, Sydorov Dmytro<sup>[b]</sup>, Qian Zhang<sup>[a]</sup>, Shengwen Zhong<sup>\*[a]</sup>

<sup>[a]</sup> *Jiangxi Key Laboratory of Power Batteries and Materials, Faculty of Materials Metallurgy and Chemistry, Jiangxi University of Sciences and Technology, Ganzhou 341000, China, E-mail: [chenjun@jxust.edu.cn](mailto:chenjun@jxust.edu.cn), [zhongshw@126.com](mailto:zhongshw@126.com)*

<sup>[b]</sup> *Joint Department of Electrochemical Energy Systems, Institute of Bioorganic Chemistry and Petrochemistry, National Academy of Sciences of Ukraine, 38A Vernadsky Ave, Kiev, 03142, Ukraine*

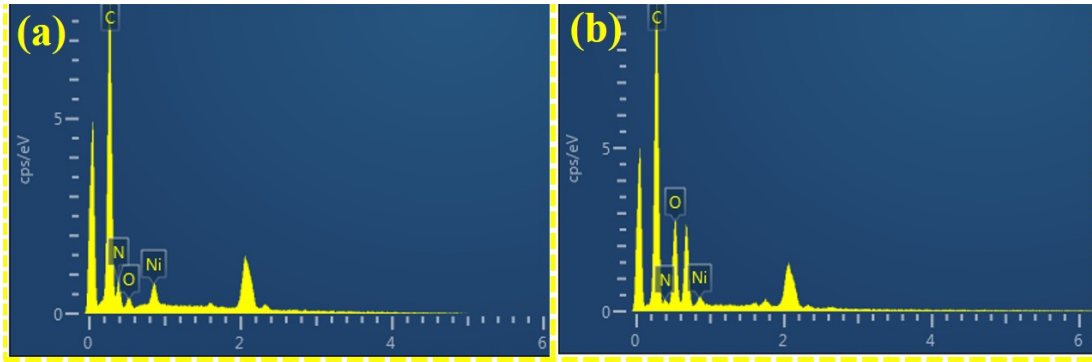

Fig. S1 Elemental distribution of CONH-NiPc and GO-CONH-NiPc polymers

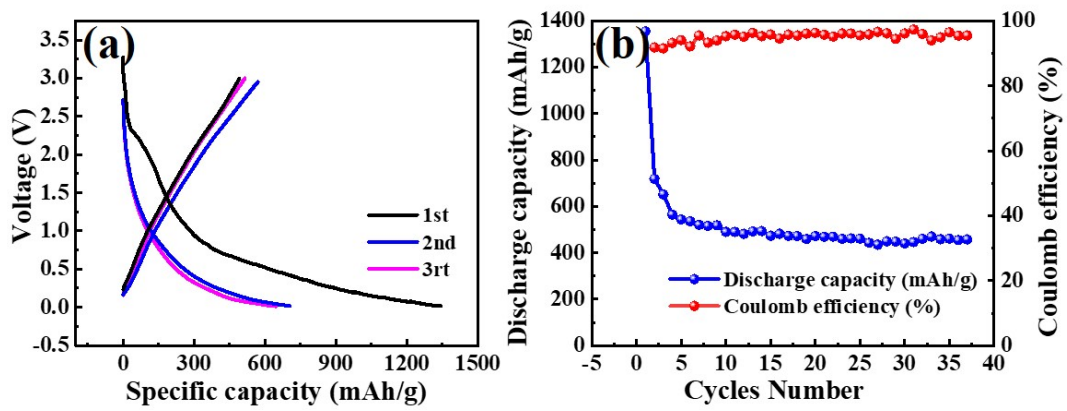

Fig. S2 (a) Initial charge-discharge curves of GO and (b) cycling curves of GO

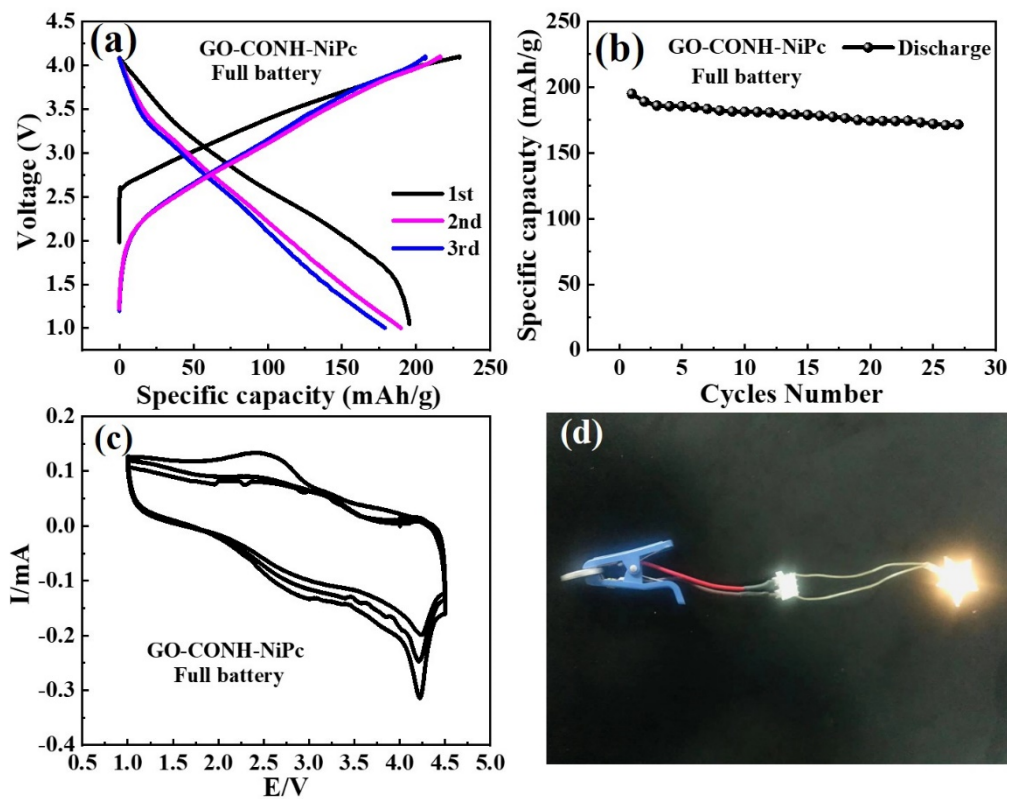

**Fig. S3;** (a) Initial charge/discharge curves of GO-CONH-NiPc/NCM-811 battery; (b) cycling curves of GO-CONH-NiPc/NCM-811 battery; (c) CV curves of GO-CONH-NiPc/NCM-811 battery; (d) Photo of the GO-CONH-NiPc/NCM-811 fully battery-powered illuminated LED light.

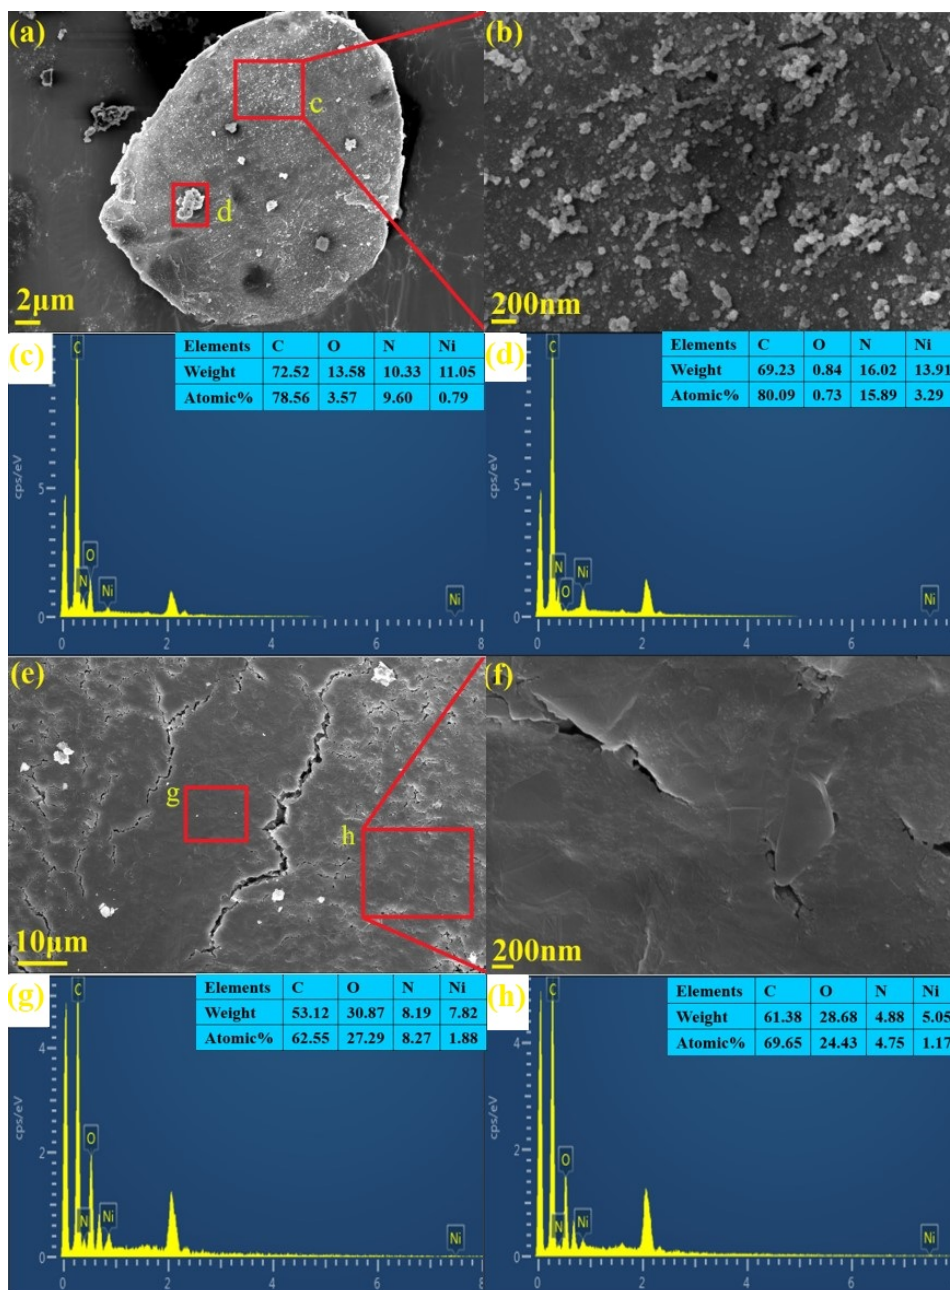

Fig. S4 EDS images of GO-CONH-NiPc (a-d) primitive and (e-h) after of 450 cycles
